# Supplementary material for: Distinguishing between enamel fluorosis and other enamel defects in permanent teeth of children
Source: PeerJ. 2016 Feb 25;4:e1745. doi: 10.7717/peerj.1745 (PMC4782718; doi:10.7717/peerj.1745)
Supplement: Data S1 [file peerj-04-1745-s001.xlsx]

## Sheet: Sheet1
ID	school	sex	region	Area	photonumber	birthdaymonth	gestationalage	birthweight	birthheight	deliverytype	birthseason	illness	DDE	fluorosis	fluorosisTF	fluorosisDean	matchingDDE	matchingfluorosis	Attributable	DeanScore2	DeanScore3	DeanScore4	TFscore2	TFscore3	TFscorecut	TFscore4	dean1	dean2	dean3	dean	tf1	tf2	tf3	tf4	tf	ref_Fluorosis
1	1	1	3	1	40	12	38	3000	50	0		1	1	0	0	0	2	0	0	0.5	1	0	2	2	1	3	1	1	0	0	1	1	1	1	0	6
2	1	1	3	1	43	11	38	3100	52	0		1	1	1	1	0.5	1	1	1	0.5	0.5	0	2	1	1	0	1	1	0	1	1	1	1	0	1	5
3	1	1	3	1	46	4	36	2790	50	2		1	1	0	0	0	1	0	0	3	3	0	3	3	3	4	1	1	0	0	1	1	1	1	0	6
4	1	1	3	1	50	5	38	3400	46	2		1	0	0	0	0	2	0	0	0	0	0	1	1	0	0	0	0	0	0	1	1	0	0	0	2
5	1	1	3	1	53	4	38	3030		0		1	0	0	0	0	2	0	0	0	0	0	1	0	5	0	0	0	0	0	1	0	1	0	0	2
6	2	2	3	1	61	12				0		0	1	1	3	2	2	2	0	2	3	2	3	3	7	3	1	1	1	1	1	1	1	1	1	7
7	2	2	3	1	66	7	38			0		0	1	0	0	0	2	0	0	3	3	3	3	5	8	2	1	1	1	0	1	1	1	1	0	7
8	2	2	3	1	78	11	38	3100	45	0		0	1	0	0	0	2	0	0	0.5	0	0.5	0	0	1	0	1	0	1	0	0	0	1	0	0	3
9	2	2	3	1	93	10	38	3300		0		0	1	1	2	1	1	1	1	2	2	2	3	2	3	2	1	1	1	1	1	1	1	1	1	7
10	2	2	3	1	95	6	38	3600	51	0		1	1	1	3	1	1	1	1	0.5	2	3	1	3	3	1	1	1	1	1	1	1	1	1	1	7
11	2	2	3	1	99	1	38	3000		0		1	0	0	0	0	2	0	0	0	0	2	2	0	4	0	0	0	1	0	1	0	1	0	0	3
12	2	2	3	1	101	9	38	3300	50	0		1	0	0	0	0	2	0	0	0.5	0	2	2	2	4	0	1	0	1	0	1	1	1	0	0	5
13	2	2	3	1	105	7	38	3230	50	0		1	1	1	3	2	2	2	0	2	3	3	3	3	8	2	1	1	1	1	1	1	1	1	1	7
14	2	2	3	1	109	11	38	2300	50	2		1	1	1	4	3	1	1	1	0.5	1	3	3	2	8	4	1	1	1	1	1	1	1	1	1	7
15	2	2	3	1	112	4	33	700		2		1	1	0	0	0	1	0	0	1	0.5	3	2	5	6	1	1	1	1	0	1	1	1	1	0	7
16	2	2	3	1	120	1	38	3080		0		0	0	0	0	0	1	0	0	0.5	3	3	4	0	7	0	1	1	1	0	1	0	1	0	0	5
17	3	2	3	1	125	6	38	3300		0		1	0	0	0	0	1	0	0	1	0.5	2	2	4	7	2	1	1	1	0	1	1	1	1	0	7
18	3	2	3	1	131	7	38			0		0	0	0	0	0	1	0	0	0	0.5	1	1	1	1	0	0	1	1	0	1	1	1	0	0	5
19	3	2	3	1	135	4	38			0		1	1	1	3	2	1	1	1	1	2	1	2	3	9	3	1	1	1	1	1	1	1	1	1	7
20	3	2	3	1	147	9	38			0		1	1	1	2	1	2	2	0	2	3	3	3	2	7	3	1	1	1	1	1	1	1	1	1	7
21	3	2	3	1	152	1	39	2800		0		1	0	0	0	0	2	0	0	0.5	0	1	1	1	5	2	1	0	1	0	1	1	1	1	0	6
22	3	2	3	1	154	8	38			0		1	1	1	2	1	2	2	0	0.5	0.5	1	1	1	2	1	1	1	1	1	1	1	1	1	1	7
23	3	2	3	1	156	1	38	3200	51	0		1	1	1	3	2	2	2	0	1	1	1	2	1	3	2	1	1	1	1	1	1	1	1	1	7
24	3	2	3	1	159	11	38			0		1	1	1	3	2	1	1	1	2	3	3	3	4	8	4	1	1	1	1	1	1	1	1	1	7
25	3	2	3	1	164	9	38	3850	51	0		1	1	0	0	0	1	0	0	1	0	3	3	4	8	3	1	0	1	0	1	1	1	1	0	6
26	3	2	3	1	166	4	38	3200	50	0		1	1	1	2	0.5	2	2	0	1	1	1	2	1	1	2	1	1	1	1	1	1	1	1	1	7
27	3	2	3	1	167	8	38			0		1	0	0	0	0	2	0	0	2	0	3	2	5	8	5	1	0	1	0	1	1	1	1	0	6
28	3	2	3	1	176	6	38			0		1	1	1	2	1	2	2	0	1	2	0.5	3	2	2	3	1	1	1	1	1	1	1	1	1	7
29	4	1	3	1	185	11	34	2450	46	0		1	0	0	0	0	2	0	0	2	1	1	2	1	1	4	1	1	1	0	1	1	1	1	0	7
30	4	1	3	1	186	8	38	3250	50	0		0	0	0	0	0	1	0	0	0.5	0.5	1	1	0	1	0	1	1	1	0	1	0	1	0	0	5
31	4	1	3	1	189	8	38	3000	49	0		1	1	0	0	0	1	0	0	1	1	2	2	1	1	1	1	1	1	0	1	1	1	1	0	7
32	4	1	3	1	203	6	38	3600	51	0		1	0	0	0	0	2	0	0	0.5	0.5	3	1	1	5	3	1	1	1	0	1	1	1	1	0	7
33	4	1	3	1	208	9	38	3000	47	0		0	1	0	0	0	2	0	0	1	0.5	3	4	1	6	3	1	1	1	0	1	1	1	1	0	7
34	4	1	3	1	211	10	36	3000	49	2		1	1	0	0	0	1	0	0	0.5	0	3	3	1	7	4	1	0	1	0	1	1	1	1	0	6
35	5	1	3	1	221	2	38	2350	45	2		0	1	0	0	0	2	0	0	0	0	0	1	0	0	0	0	0	0	0	1	0	0	0	0	1
36	5	1	3	1	223	7	38	3560	51	2		1	1	1	2	1	1	1	1	1	0.5	1	1	1	2	3	1	1	1	1	1	1	1	1	1	7
37	5	1	3	1	230	5	39	3500	50	0		1	1	0	0	0	2	0	0	0.5	1	0.5	1	1	3	3	1	1	1	0	1	1	1	1	0	7
38	5	1	3	1	231	7	38	3400	48	2		0	1	0	0	0	2	0	0	0.5	0.5	0.5	1	0	0	0	1	1	1	0	1	0	0	0	0	4
39	6	1	3	1	247	7	38	3700		0		1	0	0	0	0	2	0	0	2	0	0.5	0	0	0	3	1	0	1	0	0	0	0	1	0	3
40	6	1	3	1	249	7	36	2800	50	0		1	1	1	4	3	2	2	0	3	3	3	4	4	6	5	1	1	1	1	1	1	1	1	1	7
41	6	1	3	1	252	11	38			0		1	1	0	0	0	2	0	0	3	3	3	3	3	7	3	1	1	1	0	1	1	1	1	0	7
42	6	1	3	1	256	2	38	3000		0		1	0	0	0	0	2	0	0	3	0	2	2	1	1	2	1	0	1	0	1	1	1	1	0	6
43	6	1	3	1	262	2	38	2950	50	2		0	1	0	0	0	2	0	0	1	0.5	0.5	1	0	3	0	1	1	1	0	1	0	1	0	0	5
44	6	1	3	1	265	6	38	3070		0		1	1	0	0	0	2	0	0	0.5	0	2	4	0	0	2	1	0	1	0	1	0	0	1	0	4
45	6	1	3	1	268	5	38	3850	50	0		0	0	0	0	0	1	0	0	0.5	0	3	3	2	8	3	1	0	1	0	1	1	1	1	0	6
46	6	1	3	1	270	8	38	2800		0		1	0	0	0	0	2	0	0	0.5	0	0	1	0	0	0	1	0	0	0	1	0	0	0	0	2
47	6	1	3	1	273	6	37	3350		2		1	1	0	0	0	1	0	0	0.5	0.5	3	1	2	6	0	1	1	1	0	1	1	1	0	0	6
48	6	1	3	1	280	6	38	2800		2		1	1	1	3	2	2	2	0	3	3	3	2	5	8	5	1	1	1	1	1	1	1	1	1	7
49	6	1	3	1	283	11	38	2500		2		1	1	0	0	0	2	0	0	0.5	1	2	2	4	5	1	1	1	1	0	1	1	1	1	0	7
50	6	1	3	1	286	11	38	3800	52	0		0	0	0	0	0	1	0	0	0.5	0	1	1	0	3	0	1	0	1	0	1	0	1	0	0	4
51	6	1	3	1	287	12	38	3430	49	2		1	1	0	0	0	2	0	0	3	3	3	3	4	8	4	1	1	1	0	1	1	1	1	0	7
52	6	1	3	1	289	4	38	2900	48	2		1	1	1	1	0.5	2	2	0	1	1	2	1	2	1	2	1	1	1	1	1	1	1	1	1	7
53	6	1	3	1	290	8	38			0		1	1	1	4	3	2	2	0	3	3	3	4	4	8	6	1	1	1	1	1	1	1	1	1	7
54	6	1	3	1	291	3	38	3150	48	0		0	0	0	0	0	1	0	0	0.5	0.5	0.5	1	0	2	0	1	1	1	0	1	0	1	0	0	5
55	6	1	3	1	294	6	38	2750	48	2		1	1	1	3	2	1	1	1	2	2	3	2	2	2	3	1	1	1	1	1	1	1	1	1	7
56	6	1	3	1	296	8	38	2900	49	0		1	0	0	0	0	2	0	0	1	1	3	3	0	9	1	1	1	1	0	1	0	1	1	0	6
57	7	2	4	1	302	8	38	2950	49	0		1	1	1	1	0.5	2	2	0	1	3	3	3	4	8	2	1	1	1	1	1	1	1	1	1	7
58	7	2	4	1	305	10	38	4100	54	2		0	1	1	5	3	2	2	0	3	3	3	3	3	2	4	1	1	1	1	1	1	1	1	1	7
59	7	2	4	1	306	6	38			0		0	1	1	2	1	2	2	0	1	1	0.5	2	1	2	2	1	1	1	1	1	1	1	1	1	7
60	7	2	4	1	313	3	38	3800	52	0		1	0	0	0	0	2	0	0	0.5	0	1	1	2	4	0	1	0	1	0	1	1	1	0	0	5
61	7	2	4	1	315	11	38	2820	45	0		0	0	0	0	0	1	0	0	1	0	1	4	1	5	2	1	0	1	0	1	1	1	1	0	6
62	7	2	4	1	317	1	38	3150		2		0	0	0	0	0	1	0	0	2	1	2	5	2	6	4	1	1	1	0	1	1	1	1	0	7
63	7	2	4	1	318	3	38	3800	55	2		1	0	0	0	0	2	0	0	0	0	0	0	0	2	0	0	0	0	0	0	0	1	0	0	1
64	7	2	4	1	321	6	38	3700	51	2		1	0	0	0	0	2	0	0	1	0	3	2	2	2	1	1	0	1	0	1	1	1	1	0	6
65	7	2	4	1	322	7	38	3550	51	2		1	0	0	0	0	2	0	0	0.5	0	0	1	0	2	2	1	0	0	0	1	0	1	1	0	4
66	7	2	4	1	324	2	30	1300		2		1	0	0	0	0	2	0	0	2	2	2	3	2	6	2	1	1	1	0	1	1	1	1	0	7
67	7	2	4	1	326	10	38	3310	51	2		1	1	0	0	0	1	0	0	2	3	3	3	3	7	3	1	1	1	0	1	1	1	1	0	7
68	7	2	4	1	331	10	38	2850	63	0		1	0	0	0	0	2	0	0	0.5	0.5	1	2	0	0	1	1	1	1	0	1	0	0	1	0	5
69	7	2	4	1	332	9	38	3050	46	2		1	0	0	0	0	2	0	0	0.5	0	0.5	0	1	1	0	1	0	1	0	0	1	1	0	0	4
70	7	2	4	1	334	8	38	3320	51	2		1	0	0	0	0	2	0	0	1	0	1	3	1	1	1	1	0	1	0	1	1	1	1	0	6
71	7	2	4	1	335	2	38	3250	51	0		1	0	0	0	0	2	0	0	0	0.5	0	1	1	1	0	0	1	0	0	1	1	1	0	0	4
72	7	2	4	1	336	7	38	2300		0		1	0	0	0	0	2	0	0	2	1	2	2	1	7	2	1	1	1	0	1	1	1	1	0	7
73	7	2	4	1	340	7	34	2400	44	0		1	1	0	0	0	2	0	0	0.5	0.5	3	0	1	8	0	1	1	1	0	0	1	1	0	0	5
74	7	2	4	1	348	6	38	3200		2		1	1	1	2	2	1	1	1	2	2	3	3	2	1	2	1	1	1	1	1	1	1	1	1	7
75	7	2	4	1	350		38	3400		0		1	1	1	3	2	2	2	0	2	2	2	3	3	3	3	1	1	1	1	1	1	1	1	1	7
76	7	2	4	1	351	7	38					1	0	0	0	0	2	0	0	1	0.5	1	2	1	9	1	1	1	1	0	1	1	1	1	0	7
77	7	2	4	1	353	11	38	3500	49	2		0	0	0	0	0	1	0	0	0.5	0	0.5	1	0	2	0	1	0	1	0	1	0	1	0	0	4
78	7	2	4	1	355		38	3000	52	2		1	0	0	0	0	2	0	0	0	0	0	0	0	0	0	0	0	0	0	0	0	0	0	0	0
79	7	2	4	6	357		38	3000		0		0	1	0	0	0	2	0	0	1	1	2	3	2	2	4	1	1	1	0	1	1	1	1	0	7
80	7	2	4	1	359	5	38	3350	45	2		1	1	1	2	1	2	2	0	1	1	2	3	2	3	3	1	1	1	1	1	1	1	1	1	7
81	7	2	4	1	361	8	38	3600	50	2		1	1	0	0	0	2	0	0	2	3	3	4	1	8	2	1	1	1	0	1	1	1	1	0	7
82	7	2	4	1	366	7	38	3120	49	2		1	1	1	3	2	2	2	0	2	3	3	3	3	3	2	1	1	1	1	1	1	1	1	1	7
83	7	2	4	1	373	7	38	3500		2		1	1	0	0	0	2	0	0	0.5	0	2	2	0	7	0	1	0	1	0	1	0	1	0	0	4
84	7	2	4	1	375	11	38	3200	36	2		0	1	1	3	2	2	2	0	3	3	3	3	2	8	2	1	1	1	1	1	1	1	1	1	7
85	8	1	4	1	377	6	38	3850		0		1	0	0	0	0	2	0	0	1	0	3	4	1	1	1	1	0	1	0	1	1	1	1	0	6
86	8	1	4	1	381	1	38	3000	42	0		1	0	0	0	0	2	0	0	2	3	3	3	1	2	2	1	1	1	0	1	1	1	1	0	7
87	8	1	4	1	386	9	38	3300		0		0	1	0	0	0	2	0	0	1	2	2	2	1	1	2	1	1	1	0	1	1	1	1	0	7
88	8	1	4	1	390	3	38	3000		0		1	1	1	2	1	2	2	0	2	3	3	4	2	8	3	1	1	1	1	1	1	1	1	1	7
89	8	1	4	5	391	7	38	3200	50	2		1	1	1	2	1	1	1	1	2	2	3	3	2	1	2	1	1	1	1	1	1	1	1	1	7
90	8	1	4	1	396	10	38			0		1	0	0	0	0	2	0	0	0.5	2	3	2	0	2	1	1	1	1	0	1	0	1	1	0	6
91	8	1	4	1	398	10	38	2600	44	0		1	1	1	1	1	2	2	0	2	3	3	4	2	8	3	1	1	1	1	1	1	1	1	1	7
92	8	1	4	1	402	7	34	2300	46	2		1	1	0	0	0	1	0	0	2	3	3	3	2	8	2	1	1	1	0	1	1	1	1	0	7
93	8	1	4	1	405	11	38	3700	51	2		1	1	1	3	2	1	1	1	1	2	3	2	2	2	3	1	1	1	1	1	1	1	1	1	7
94	8	1	4	1	410	6	38	3000	50	0		1	1	1	2	1	2	2	0	1	1	1	1	1	1	1	1	1	1	1	1	1	1	1	1	7
95	8	1	4	1	413	3	38			0		0	0	0	0	0	1	0	0	0	0	0.5	1	0	1	0	0	0	1	0	1	0	1	0	0	3
96	8	1	4	1	416	12	38	3800	50	0		1	1	1	4	3	2	2	0	3	3	4	3	3	9	4	1	1	1	1	1	1	1	1	1	7
97	8	1	4	1	418	10	38	3650	52	0		0	1	1	2	1	2	2	0	1	2	2	2	1	2	2	1	1	1	1	1	1	1	1	1	7
98	8	1	4	1	422	11	38	3200		0		1	1	1	2	1	2	2	0	3	3	4	3	2	6	5	1	1	1	1	1	1	1	1	1	7
99	8	1	4	1	428	3	38	3900		0		0	1	1	3	2	2	2	0	1	2	3	3	2	2	2	1	1	1	1	1	1	1	1	1	7
100	8	1	4	5	434	9	38	3400	50	0		0	0	0	0	0	1	0	0	0	0	0.5	0	0	0	2	0	0	1	0	0	0	0	1	0	2
101	8	1	4	1	439	8	38	2000	45	2		1	1	0	0	0	1	0	0	1	3	2	1	2	7	3	1	1	1	0	1	1	1	1	0	7
102	9	1	1	1	442	6	38	3300	51	2		1	1	1	2	1	2	2	0	2	3	3	3	2	2	2	1	1	1	1	1	1	1	1	1	7
103	9	1	1	1	444	10	30	1150	36	2		1	1	1	2	1	2	2	0	0.5	0.5	2	2	3	0	0	1	1	1	1	1	1	0	0	1	5
104	9	1	1	1	448	6	38	3000	50	2		1	1	1	2	1	2	2	0	1	2	3	3	2	1	2	1	1	1	1	1	1	1	1	1	7
105	9	1	1	1	450	9	38	3150	50	2		1	0	0	0	0	2	0	0	0.5	0	2	2	1	1	0	1	0	1	0	1	1	1	0	0	5
106	9	1	1	1	451	3	38	2900	50	2		1	0	0	0	0	2	0	0	1	0	1	2	2	0	0	1	0	1	0	1	1	0	0	0	4
107	9	1	1	1	453	3	38	3000	50	2		1	0	0	0	0	2	0	0	0.5	2	1	1	2	2	3	1	1	1	0	1	1	1	1	0	7
108	9	1	1	1	455	2	36	3930	51	2		1	0	0	0	0	2	0	0	1	0	2	1	0	2	1	1	0	1	0	1	0	1	1	0	5
109	9	1	1	1	457	11	38	3170	50	0		1	0	0	0	0	2	0	0	0.5	0	1	1	2	0	1	1	0	1	0	1	1	0	1	0	5
110	9	1	1	1	458	9	38	3400	48	2		1	0	0	0	0	2	0	0	1	2	0	1	0	2	0	1	1	0	0	1	0	1	0	0	4
111	9	1	1	1	460	7	38	3150	51	2		0	0	0	0	0	1	0	0	0	0	0.5	1	0	0	0	0	0	1	0	1	0	0	0	0	2
112	9	1	1	1	463	1	38	3500		0		1	1	1	2	1	2	2	0	1	1	2	2	1	1	1	1	1	1	1	1	1	1	1	1	7
113	9	1	1	1	465	7	38	3250	50	0		1	1	0	0	0	2	0	0	1	0.5	1	4	1	6	0	1	1	1	0	1	1	1	0	0	6
114	9	1	1	1	469	8	38	3100	49	0		1	0	0	0	0	2	0	0	0	0	0	1	1	6	0	0	0	0	0	1	1	1	0	0	3
115	9	1	1	1	472	7	38	3000	50	2		1	0	0	0	0	2	0	0	0.5	0.5	2	1	2	2	0	1	1	1	0	1	1	1	0	0	6
116	9	1	1	1	474	4	38	3150	51	2		0	1	0	0	0	2	0	0	1	2	3	3	2	2	1	1	1	1	0	1	1	1	1	0	7
117	9	1	1	1	478	5	38	2800	49	2		1	0	0	0	0	2	0	0	0.5	2	3	4	1	1	1	1	1	1	0	1	1	1	1	0	7
118	10	2	5	5	484	2	38	2450	45	0		1	0	0	0	0	2	0	0	3	3	2	4	2	0	0	1	1	1	0	1	1	0	0	0	5
119	10	2	5	5	486	12				0		0	0	0	0	0	1	0	0	1	3	1	1	1	3	0	1	1	1	0	1	1	1	0	0	6
120	10	2	5	5	488	2	38	2550	45	0		1	0	0	0	0	2	0	0	2	2	3	3	3	9	0	1	1	1	0	1	1	1	0	0	6
121	10	2	5	5	489	5	38	3500	54	2		1	0	0	0	0	2	0	0	2	3	2	3	3	5	2	1	1	1	0	1	1	1	1	0	7
122	10	2	5	5	491	3	38	4200	54	2		1	0	0	0	0	2	0	0	0.5	2	0	2	0	0	0	1	1	0	0	1	0	0	0	0	3
123	10	2	5	5	495	10	38	3000	49	2		1	0	0	0	0	2	0	0	0.5	3	2	4	2	1	0	1	1	1	0	1	1	1	0	0	6
124	10	2	5	5	496	9	38	3300		0		1	1	0	0	0	2	0	0	1	3	0.5	4	2	2	0	1	1	1	0	1	1	1	0	0	6
125	10	2	5	5	498	8	38	3350	49	0		0	0	0	0	0	1	0	0	1	0.5	0.5	2	3	3	2	1	1	1	0	1	1	1	1	0	7
126	10	2	5	1	499	3	38	3300	49	0		1	0	0	0	0	2	0	0	2	3	3	5	3	7	1	1	1	1	0	1	1	1	1	0	7
127	10	2	5	5	500	12	38	2500		2		1	0	0	0	0	2	0	0	2	3	3	3	3	3	3	1	1	1	0	1	1	1	1	0	7
128	10	2	5	5	502	1	38					1	0	0	0	0	2	0	0	0.5	3	1	2	2	1	2	1	1	1	0	1	1	1	1	0	7
129	10	2	5	5	504	8	38	2800	50	0		0	0	0	0	0	1	0	0	1	2	2	2	2	3	0	1	1	1	0	1	1	1	0	0	6
130	11	1	5	5	507	12	38	1800		0		1	0	0	0	0	2	0	0	0	0	1	1	0	0	0	0	0	1	0	1	0	0	0	0	2
131	11	1	5	5	508	12	38	3000	49	0		1	0	0	0	0	2	0	0	0	0.5	0.5	0	1	0	0	0	1	1	0	0	1	0	0	0	3
132	11	1	5	5	510	10	38	3050	47	2		1	0	0	0	0	2	0	0	0.5	0	1	1	2	1	0	1	0	1	0	1	1	1	0	0	5
133	11	1	5	5	511	10	38	2500		0		1	0	0	0	0	2	0	0	0.5	0.5	2	3	2	1	2	1	1	1	0	1	1	1	1	0	7
134	11	1	5	5	512	3	38	3070		0		1	1	1	2	1	1	1	1	0.5	1	3	4	2	1	0	1	1	1	1	1	1	1	0	1	6
135	11	1	5	5	515	1	38	3300	47	0		1	0	0	0	0	2	0	0	1	3	3	4	3	5	3	1	1	1	0	1	1	1	1	0	7
136	11	1	5	5	517	7	38	2850	52	0		1	1	0	0	0	2	0	0	0.5	0.5	2	2	2	2	0	1	1	1	0	1	1	1	0	0	6
137	11	1	5	5	519	3	38	3150	47	0		1	1	1	3	2	2	2	0	2	3	3	3	3	2	2	1	1	1	1	1	1	1	1	1	7
138	11	1	5	5	520	6	38	3800		0		1	0	0	0	0	2	0	0	0.5	0.5	2	3	1	3	2	1	1	1	0	1	1	1	1	0	7
139	9	1	1	1	526	2	38	2850	50	0		1	0	0	0	0	2	0	0	0.5	0.5	0.5	2	2	5	0	1	1	1	0	1	1	1	0	0	6
140	9	1	1	1	528	10	38	3600		2		1	1	0	0	0	1	0	0	1	3	3	3	3	2	2	1	1	1	0	1	1	1	1	0	7
141	9	1	1	1	531	12	34	2050		2		0	0	0	0	0	1	0	0	0.5	3	2	3	4	2	0	1	1	1	0	1	1	1	0	0	6
142	9	1	1	1	532	12	34	2100		2		0	0	0	0	0	1	0	0	0.5	1	3	2	2	2	0	1	1	1	0	1	1	1	0	0	6
143	9	1	1	1	533	9	38	3900	52	0		1	0	0	0	0	2	0	0	0.5	0.5	3	3	3	2	0	1	1	1	0	1	1	1	0	0	6
144	9	1	1	1	542	12	37	2890	49	2		1	0	0	0	0	2	0	0	2	0.5	2	2	0	2	0	1	1	1	0	1	0	1	0	0	5
145	9	1	1	1	545	6	38	2400		2		0	1	0	0	0	2	0	0	1	2	3	3	2	5	2	1	1	1	0	1	1	1	1	0	7
146	9	1	1	1	547	10	38	3560	52	0		1	0	0	0	0	2	0	0	0	0	0.5	1	0	0	0	0	0	1	0	1	0	0	0	0	2
147	9	1	1	1	551	10	38	2640	48	0		1	0	0	0	0	2	0	0	0.5	0	0.5	1	3	2	0	1	0	1	0	1	1	1	0	0	5
148	12	2	1	1	552	11	38	2990	51	0		1	1	0	0	0	1	0	0	0	0	0.5	5	2	3	0	0	0	1	0	1	1	1	0	0	4
149	12	2	1	1	555	4	34	2500	47	2		1	0	0	0	0	2	0	0	2	3	3	3	3	9	3	1	1	1	0	1	1	1	1	0	7
150	12	2	1	1	556	1	38	2790	49	2		1	1	0	0	0	1	0	0	0.5	2	3	2	2	1	0	1	1	1	0	1	1	1	0	0	6
151	12	2	1	1	559	12	38	3200	48	2		1	0	0	0	0	2	0	0	0	0.5	0.5	1	2	2	0	0	1	1	0	1	1	1	0	0	5
152	12	2	1	1	561	9	38	3250	48	2		1	0	0	0	0	2	0	0	0.5	1	0	0	0	1	0	1	1	0	0	0	0	1	0	0	3
153	12	2	1	1	566	4	36	3100	50	2		1	0	0	0	0	2	0	0	0	0.5	1	1	2	2	0	0	1	1	0	1	1	1	0	0	5
154	12	2	1	1	567	10	38	3300	52	2		1	1	1	2	1	1	1	1	0.5	1	3	5	1	3	1	1	1	1	1	1	1	1	1	1	7
155	12	2	1	1	571	3	38	2900	47	0		1	1	1	3	2	1	1	1	3	3	3	3	2	3	2	1	1	1	1	1	1	1	1	1	7
156	12	2	1	1	573	9	38	3630		2		1	0	0	0	0	2	0	0	2	3	3	3	3	5	2	1	1	1	0	1	1	1	1	0	7
157	12	2	1	1	574	7	38	3000	49	0		1	1	0	0	0	2	0	0	0.5	0.5	2	4	1	1	0	1	1	1	0	1	1	1	0	0	6
158	12	2	1	1	575	10	39	3400	50	2		1	1	0	0	0	2	0	0	0	0.5	0.5	1	1	0	0	0	1	1	0	1	1	0	0	0	4
159	12	2	1	1	576	9	35	2850		0		0	0	0	0	0	1	0	0	0.5	0.5	0.5	2	1	0	0	1	1	1	0	1	1	0	0	0	5
160	12	2	1	1	578	11	38	3300	50	2		1	1	0	0	0	2	0	0	0.5	0	3	2	1	3	2	1	0	1	0	1	1	1	1	0	6
161	12	2	1	1	579	6	38	3300	49	0		1	1	1	2	1	2	2	0	1	2	3	2	2	3	1	1	1	1	1	1	1	1	1	1	7
162	12	2	1	1	581	8	38	2550	49	0		1	1	1	2	1	2	2	0	1	1	2	1	1	2	1	1	1	1	1	1	1	1	1	1	7
163	12	2	1	1	584	8	38	2800	46	2		1	0	0	0	0	2	0	0	0	0	1	4	0	1	0	0	0	1	0	1	0	1	0	0	3
164	12	2	1	1	587	10	38	4000	53	2		1	1	1	2	1	1	1	1	1	1	3	6	0	2	2	1	1	1	1	1	0	1	1	1	6
165	12	2	1	6	591	12	38	3850		0		1	1	1	3	2	2	2	0	1	3	3	3	2	7	1	1	1	1	1	1	1	1	1	1	7
166	12	2	1	1	592	10	38	3500	51	2		1	1	0	0	0	1	0	0	0	0	3	1	0	3	0	0	0	1	0	1	0	1	0	0	3
167	12	2	1	1	596	12	38	2800	49	2		1	0	0	0	0	2	0	0	0	0	0	0	0	0	0	0	0	0	0	0	0	0	0	0	0
168	13	1	5	5	597	4	38	2480		2		1	1	1	1	0.5	1	1	1	0	0.5	1	4	0	2	1	0	1	1	1	1	0	1	1	1	5
169	13	1	5	5	603	6	38	3000	51	2		1	0	0	0	0	2	0	0	0	0	0	1	1	2	0	0	0	0	0	1	1	1	0	0	3
170	13	1	5	5	605	11	38	3750		2		1	0	0	0	0	2	0	0	0.5	0.5	3	2	0	2	0	1	1	1	0	1	0	1	0	0	5
171	13	1	5	5	606	1	38	3450		2		1	0	0	0	0	2	0	0	0	0	2	3	1	1	2	0	0	1	0	1	1	1	1	0	5
172	13	1	5	5	610	12	38	2500	49	0		1	0	0	0	0	2	0	0	0	0	0	1	0	1	0	0	0	0	0	1	0	1	0	0	2
173	13	1	5	5	611	1	38	2550	48	0		1	0	0	0	0	2	0	0	0.5	3	1	1	0	5	0	1	1	1	0	1	0	1	0	0	5
174	13	1	5	5	615	11	38	2900	50	0		1	1	0	0	0	1	0	0	2	0.5	3	3	2	3	0	1	1	1	0	1	1	1	0	0	6
175	13	1	5	5	617	2	38	2000		0		1	1	0	0	0	2	0	0	2	3	3	3	2	8	3	1	1	1	0	1	1	1	1	0	7
176	13	1	5	5	620	1	38	3200		0		0	1	1	3	2	2	2	0	0.5	3	3	3	1	8	1	1	1	1	1	1	1	1	1	1	7
177	13	1	5	6	622	9	38	4000	50	2		1	0	0	0	0	2	0	0	0	0	0	1	0	1	0	0	0	0	0	1	0	1	0	0	2
178	13	1	5	5	625	7	38	3600		0		1	1	1	3	2	1	1	1	2	2	3	1	1	3	2	1	1	1	1	1	1	1	1	1	7
179	13	1	5	5	629	11	38	3000	49	0		0	1	0	0	0	2	0	0	0.5	2	3	2	2	3	3	1	1	1	0	1	1	1	1	0	7
180	13	1	5	5	630	10	38	2200	47	0		1	0	0	0	0	2	0	0	2	1	3	2	1	8	2	1	1	1	0	1	1	1	1	0	7
181	13	1	5	5	631	5	38	3200	47	0		1	1	0	0	0	1	0	0	2	2	3	2	1	8	2	1	1	1	0	1	1	1	1	0	7
182	13	1	5	5	637	3	38	2800		2		1	1	0	0	0	1	0	0	0.5	2	2	3	1	7	1	1	1	1	0	1	1	1	1	0	7
183	13	1	5	5	638	10	38	2750	48	0		1	1	0	0	0	1	0	0	2	2	2	2	3	3	1	1	1	1	0	1	1	1	1	0	7
184	13	1	5	1	640	3	38	2800		0		1	1	0	0	0	1	0	0	0.5	3	2	1	2	8	0	1	1	1	0	1	1	1	0	0	6
185	13	1	5	5	641	11	38	3500		0		1	0	0	0	0	2	0	0	2	3	3	3	3	6	0	1	1	1	0	1	1	1	0	0	6
186	13	1	5	5	644	2	38	3200	49	2		1	1	0	0	0	1	0	0	0.5	1	2	3	2	3	0	1	1	1	0	1	1	1	0	0	6
187	13	1	5	5	645	5	38	3200		2		1	0	0	0	0	2	0	0	0	0	0	0	0	0	0	0	0	0	0	0	0	0	0	0	0
188	13	1	5	5	646	5	38	2000		0		1	1	0	0	0	2	0	0	1	3	3	4	3	3	0	1	1	1	0	1	1	1	0	0	6
189	13	1	5	5	649	9	38	3400	50	0		1	1	0	0	0	1	0	0	2	3	3	3	2	5	2	1	1	1	0	1	1	1	1	0	7
190	13	1	5	6	650	7	38	3600	50	2		1	0	0	0	0	2	0	0	0	0.5	0.5	0	0	0	0	0	1	1	0	0	0	0	0	0	2
191	14	2	5	5	654	6	38	3000		0		1	0	0	0	0	2	0	0	0	0.5	0.5	2	0	5	0	0	1	1	0	1	0	1	0	0	4
192	14	2	5	5	655	9	38	3100	50	2		1	1	0	0	0	1	0	0	0.5	2	3	2	2	5	1	1	1	1	0	1	1	1	1	0	7
193	14	2	5	5	657	8	38	3800	48	0		1	0	0	0	0	2	0	0	0	0	0.5	0	0	0	0	0	0	1	0	0	0	0	0	0	1
194	14	2	5	5	658	5	38	3400	52	0		1	0	0	0	0	2	0	0	0.5	3	1	2	2	7	1	1	1	1	0	1	1	1	1	0	7
195	14	2	5	5	659	4	38	2750	47	0		1	0	0	0	0	2	0	0	2	4	4	5	0	7	4	1	1	1	0	1	0	1	1	0	6
196	14	2	5	5	661	10	38	3950	51	0		1	1	1	1	0.5	2	2	0	0.5	2	1	0	1	3	0	1	1	1	1	0	1	1	0	1	5
197	14	2	5	5	662	10	38	3100	52	0		1	1	1	2	1	1	1	1	0.5	2	2	1	1	2	1	1	1	1	1	1	1	1	1	1	7
198	14	2	5	5	663	8	38	2850	49	2		1	1	0	0	0	2	0	0	1	3	3	3	2	7	2	1	1	1	0	1	1	1	1	0	7
199	14	2	5	6	665	1	38	3200		2		1	1	1	1	1	2	2	0	0.5	3	2	1	2	2	1	1	1	1	1	1	1	1	1	1	7
200	14	2	5	5	666	2	38	2800	49	0		0	1	0	0	0	2	0	0	0.5	0.5	2	2	5	5	2	1	1	1	0	1	1	1	1	0	7
201	14	2	5	5	668	1	38	3000	47	0		1	1	0	0	0	1	0	0	0.5	2	3	2	2	3	2	1	1	1	0	1	1	1	1	0	7
202	14	2	5	5	669	2	38	2500		2		1	1	0	0	0	2	0	0	0.5	0.5	1	0	0	9	0	1	1	1	0	0	0	1	0	0	4
203	14	2	5	1	670	10	38	3200		0		1	1	1	3	2	2	2	0	0	2	2	1	1	2	0	0	1	1	1	1	1	1	0	1	5
204	14	2	5	5	673	1	38	3100	51	2		1	0	0	0	0	2	0	0	0.5	1	1	0	0	0	0	1	1	1	0	0	0	0	0	0	3
205	14	2	5	5	674	11	38	3550	52	0		1	1	0	0	0	2	0	0	2	1	2	2	3	3	0	1	1	1	0	1	1	1	0	0	6
206	14	2	5	5	676	1	38	3350	49	2		1	0	0	0	0	2	0	0	0	2	2	2	1	5	1	0	1	1	0	1	1	1	1	0	6
207	14	2	5	5	679	5	38			0		1	0	0	0	0	2	0	0	0.5	2	2	2	1	2	2	1	1	1	0	1	1	1	1	0	7
208	14	2	5	5	680	12	38	4050	54	0		1	1	0	0	0	1	0	0	2	3	3	3	3	3	3	1	1	1	0	1	1	1	1	0	7
209	14	2	5	5	682	12	38	2850	49	2		0	0	0	0	0	1	0	0	0	0.5	1	0	0	6	0	0	1	1	0	0	0	1	0	0	3
210	14	2	5	5	683	8	38	2300	49	2		1	0	0	0	0	2	0	0	0.5	3	1	4	0	0	0	1	1	1	0	1	0	0	0	0	4
211	14	2	5	5	684	6	38	3300	49	0		1	0	0	0	0	2	0	0	0.5	1	1	1	1	1	0	1	1	1	0	1	1	1	0	0	6
212	14	2	5	5	686	7	38	3450	50	0		1	0	0	0	0	2	0	0	2	3	3	3	0	5	3	1	1	1	0	1	0	1	1	0	6
213	14	2	5	5	687	3	38	4000		0		1	0	0	0	0	2	0	0	0.5	2	2	2	0	2	0	1	1	1	0	1	0	1	0	0	5
214	14	2	5	5	692	6	38	3600	51	0		0	0	0	0	0	1	0	0	1	3	3	2	2	7	2	1	1	1	0	1	1	1	1	0	7
215	14	2	5	5	696	10	38	3600		2		1	0	0	0	0	2	0	0	0	0	0	0	3	2	0	0	0	0	0	0	1	1	0	0	2
216	15	2	5	5	699	3	38	2900		0		1	1	0	0	0	2	0	0	0	3	2	1	3	3	4	0	1	1	0	1	1	1	1	0	6
217	15	2	5	5	703	7	38	3500		0		0	1	0	0	0	2	0	0	2	3	2	2	2	3	2	1	1	1	0	1	1	1	1	0	7
218	15	2	5	5	706	10	38	4180		0		0	1	0	0	0	2	0	0	2	3	3	2	2	7	2	1	1	1	0	1	1	1	1	0	7
219	15	2	5	5	707	8	38	3700		0		1	1	0	0	0	1	0	0	0	2	2	2	1	1	0	0	1	1	0	1	1	1	0	0	5
220	15	2	5	5	711	9	38	3000		2		1	1	0	0	0	2	0	0	4	3	4	3	4	7	0	1	1	1	0	1	1	1	0	0	6
221	16	2	5	5	744	8	38	2900	45	2		1	0	0	0	0	2	0	0	0	1	0	0	1	2	0	0	1	0	0	0	1	1	0	0	3
222	16	2	5	5	746	2	38	3300	54	2		1	1	0	0	0	1	0	0	0.5	2	3	1	2	7	0	1	1	1	0	1	1	1	0	0	6
223	16	2	5	5	747	12	38	2000		0		1	0	0	0	0	2	0	0	0	0	3	1	0	2	0	0	0	1	0	1	0	1	0	0	3
224	16	2	5	5	750	11	38	3700		0		1	0	0	0	0	2	0	0	0.5	0.5	3	2	0	8	1	1	1	1	0	1	0	1	1	0	6
225	16	2	5	5	753	4	36	3500	51	2		1	0	0	0	0	2	0	0	1	3	3	2	2	8	2	1	1	1	0	1	1	1	1	0	7
226	16	2	5	5	754	1	38	3500	55	0		1	0	0	0	0	2	0	0	0.5	2	2	1	0	2	0	1	1	1	0	1	0	1	0	0	5
227	16	2	5	5	755	7	34	2200	44	0		1	0	0	0	0	2	0	0	0	1	0	1	0	2	0	0	1	0	0	1	0	1	0	0	3
228	16	2	5	5	759	9	38	3100		0		1	0	0	0	0	2	0	0	0.5	0.5	2	1	0	2	0	1	1	1	0	1	0	1	0	0	5
229	16	2	5	5	761	9	38	4000		2		1	1	0	0	0	2	0	0	1	1	2	2	0	3	1	1	1	1	0	1	0	1	1	0	6
230	16	2	5	5	763	7	37	3300	52	2		1	0	0	0	0	2	0	0	0	0	1	1	0	0	0	0	0	1	0	1	0	0	0	0	2
231	16	2	5	5	765	5	38	2600		0		1	1	0	0	0	2	0	0	1	2	3	2	1	7	0	1	1	1	0	1	1	1	0	0	6
232	17	1	5	5	768	12	38	3000		2		1	1	0	0	0	2	0	0	3	2	3	1	0	5	2	1	1	1	0	1	0	1	1	0	6
233	17	1	5	5	770	10	38	2700		2		1	1	1	2	1	1	1	1	0.5	3	3	1	2	2	1	1	1	1	1	1	1	1	1	1	7
234	17	1	5	5	773	12	38			2		1	1	0	0	0	1	0	0	0.5	3	3	2	2	3	1	1	1	1	0	1	1	1	1	0	7
235	17	1	5	5	774	1	38	2700		2		1	0	0	0	0	2	0	0	0.5	1	2	2	0	3	0	1	1	1	0	1	0	1	0	0	5
236	17	1	5	5	775	8	38	3780		2		1	1	0	0	0	1	0	0	0.5	2	1	2	2	2	0	1	1	1	0	1	1	1	0	0	6
237	17	1	5	5	776	11	38	2850	50	2		1	1	0	0	0	2	0	0	0.5	2	3	3	2	3	2	1	1	1	0	1	1	1	1	0	7
238	17	1	5	5	782	7	36	2700		1		1	0	0	0	0	2	0	0	1	1	1	1	1	0	0	1	1	1	0	1	1	0	0	0	5
239	17	1	5	5	783	7	38	2900	50	2		1	0	0	0	0	2	0	0	1	3	3	3	1	7	2	1	1	1	0	1	1	1	1	0	7
240	18	1	2	1	785	9	38	3850		0		1	0	0	0	0	2	0	0	0	1	1	0	0	3	0	0	1	1	0	0	0	1	0	0	3
241	18	1	2	1	789	5	38	3000	50	2		1	1	1	1	1	2	2	0	1	2	3	2	1	5	2	1	1	1	1	1	1	1	1	1	7
242	18	1	2	1	791	8	38	3200	51	2		1	1	0	0	0	1	0	0	0.5	0.5	2	1	1	2	1	1	1	1	0	1	1	1	1	0	7
243	18	1	2	1	795	10	38	2900	52	0		1	1	0	0	0	2	0	0	0	2	1	1	1	3	0	0	1	1	0	1	1	1	0	0	5
244	18	1	2	1	797	2	38	3100	50	2		1	0	0	0	0	2	0	0	0.5	0.5	1	1	1	2	1	1	1	1	0	1	1	1	1	0	7
245	18	1	2	1	799	1	38	4000	50	2		1	1	1	2	1	1	1	1	1	2	3	2	2	2	1	1	1	1	1	1	1	1	1	1	7
246	18	1	2	1	804	5	38	2650	48	2		1	0	0	0	0	2	0	0	0	2	2	1	0	0	0	0	1	1	0	1	0	0	0	0	3
247	18	1	2	1	806	4	38	3700	52	0		1	0	0	0	0	2	0	0	0	0	0.5	1	0	0	0	0	0	1	0	1	0	0	0	0	2
248	18	1	2	1	808	6	38	3490	51	0		1	1	0	0	0	2	0	0	0.5	3	3	2	0	9	0	1	1	1	0	1	0	1	0	0	5
249	18	1	2	1	810	2	34	3300	48	0		1	0	0	0	0	2	0	0	0.5	2	1	2	0	5	0	1	1	1	0	1	0	1	0	0	5
250	18	1	2	1	816	10	38	3050	48	0		1	1	0	0	0	2	0	0	0	1	0.5	2	1	0	0	0	1	1	0	1	1	0	0	0	4
251	18	1	2	1	817	11	38	3700	53	0		1	1	0	0	0	2	0	0	1	3	3	3	2	5	3	1	1	1	0	1	1	1	1	0	7
252	18	1	2	1	821	2	38	2800	49	2		1	1	1	1	1	2	2	0	1	2	3	2	2	3	2	1	1	1	1	1	1	1	1	1	7
253	18	1	2	1	823	12	38	4600	53	2		1	1	0	0	0	2	0	0	1	3	3	3	2	3	2	1	1	1	0	1	1	1	1	0	7
254	19	2	2	1	824	7	38	3100	49	2		1	0	0	0	0	2	0	0	0	0	0	0	0	0	0	0	0	0	0	0	0	0	0	0	0
255	19	2	2	1	825	6	38	3600	50	0		1	0	0	0	0	2	0	0	0.5	2	3	1	0	7	0	1	1	1	0	1	0	1	0	0	5
256	19	2	2	1	829	7	38	3600	51	2		1	1	0	0	0	1	0	0	0.5	2	2	1	2	3	2	1	1	1	0	1	1	1	1	0	7
257	19	2	2	1	831	1	38	3540	50	0		1	1	1	1	1	2	2	0	1	1	1	2	1	2	2	1	1	1	1	1	1	1	1	1	7
258	19	2	2	1	834	6	38	3600		2		1	0	0	0	0	2	0	0	0.5	0.5	3	2	0	3	0	1	1	1	0	1	0	1	0	0	5
259	19	2	2	1	835	2	38	3750	54	2		1	1	0	0	0	2	0	0	0.5	1	1	4	2	3	0	1	1	1	0	1	1	1	0	0	6
260	19	2	2	1	841	8	38	3650	52	0		1	1	0	0	0	1	0	0	0.5	2	3	1	1	2	0	1	1	1	0	1	1	1	0	0	6
261	19	2	2	1	844	3	38	3250		2		1	1	1	2	1	2	2	0	3	3	3	3	2	8	2	1	1	1	1	1	1	1	1	1	7
262	19	2	2	1	847	11	38	3350	41	2		1	1	0	0	0	1	0	0	0.5	1	3	2	1	2	1	1	1	1	0	1	1	1	1	0	7
263	19	2	2	1	848	5	38	2900	33	2		1	1	1	3	2	2	2	0	3	3	3	3	2	7	3	1	1	1	1	1	1	1	1	1	7
264	19	2	2	1	853	5	38	3040	46	0		1	1	0	0	0	2	0	0	2	3	3	2	1	7	2	1	1	1	0	1	1	1	1	0	7
265	19	2	2	1	861	8	38	3000	51	2		1	0	0	0	0	2	0	0	0	0.5	1	1	0	1	0	0	1	1	0	1	0	1	0	0	4
266	19	2	2	1	862	10	38	3300	50	2		1	0	0	0	0	2	0	0	0	0.5	1	1	0	1	0	0	1	1	0	1	0	1	0	0	4
267	20	2	6	6	864	6	38	3150		0		1	0	0	0	0	2	0	0	0	0.5	1	1	0	2	0	0	1	1	0	1	0	1	0	0	4
268	20	2	6	6	865	1	38	3500	52	0		1	1	1	2	1	2	2	0	1	3	3	3	2	3	2	1	1	1	1	1	1	1	1	1	7
269	20	2	6	6	866	5	38	3700		0		1	1	1	3	2	2	2	0	2	3	3	3	3	3	2	1	1	1	1	1	1	1	1	1	7
270	20	2	6	6	867	8	38			2		1	1	1	7	3	2	2	0	2	4	4	5	4	8	4	1	1	1	1	1	1	1	1	1	7
271	20	2	6	6	868	9	38	3850	50	0		1	0	0	0	0	2	0	0	0.5	0	2	1	1	2	0	1	0	1	0	1	1	1	0	0	5
272	20	2	6	1	869	9	38	4000		2		1	0	0	0	0	2	0	0	0	0	0.5	0	0	1	0	0	0	1	0	0	0	1	0	0	2
273	20	2	6	6	870	11	38	3700	54	0		1	1	1	4	3	2	2	0	3	3	3	2	3	3	2	1	1	1	1	1	1	1	1	1	7
274	20	2	6	6	871	12	38	4200	37	0		1	1	1	7	3	2	2	0	3	4	4	4	4	8	4	1	1	1	1	1	1	1	1	1	7
275	20	2	6	6	874	12	38	3750		2		1	1	1	3	2	2	2	0	1	3	3	2	2	2	0	1	1	1	1	1	1	1	0	1	6
276	20	2	6	6	877	8	38	3900	54	0		1	0	0	0	0	2	0	0	0.5	3	3	1	2	1	1	1	1	1	0	1	1	1	1	0	7
277	20	2	6	6	878	12	38	2800		0		1	1	1	4	3	1	1	1	2	3	2	2	3	2	1	1	1	1	1	1	1	1	1	1	7
278	20	2	6	6	879	4	38	2800	47	0		1	1	1	4	3	2	2	0	2	3	3	3	3	3	0	1	1	1	1	1	1	1	0	1	6
279	20	2	6	6	880	8	38	2500	45	2		1	1	1	8	4	2	2	0	3	4	4	8	5	8	7	1	1	1	1	1	1	1	1	1	7
280	20	2	6	6	881	4	38	2800	51	2		1	0	0	0	0	2	0	0	0.5	2	2	0	1	3	0	1	1	1	0	0	1	1	0	0	5
281	20	2	6	6	882	3	38	2700		0		0	0	0	0	0	1	0	0	0.5	0.5	2	1	1	1	0	1	1	1	0	1	1	1	0	0	6
282	20	2	6	6	883	8	30	1800		0		1	1	0	0	0	1	0	0	0.5	3	2	2	2	7	3	1	1	1	0	1	1	1	1	0	7
283	20	2	6	6	884	1	38			0		0	1	0	0	0	2	0	0	1	3	2	2	2	4	2	1	1	1	0	1	1	1	1	0	7
284	21	1	6	6	886	9	38	3400	50	2		0	1	1	2	1	1	1	1	1	2	3	2	1	9	0	1	1	1	1	1	1	1	0	1	6
285	21	1	6	6	887	6	38	3000		0		1	1	1	3	3	2	2	0	3	3	3	3	4	8	3	1	1	1	1	1	1	1	1	1	7
286	21	1	6	6	888	9	38	3500	52	2		1	1	0	0	0	2	0	0	0	0.5	1	1	2	3	0	0	1	1	0	1	1	1	0	0	5
287	21	1	6	6	889	10	38	3100	48	2		1	0	0	0	0	2	0	0	0.5	2	3	1	2	4	2	1	1	1	0	1	1	1	1	0	7
288	21	1	6	6	892	8	38	3150	51	0		1	0	0	0	0	2	0	0	2	3	3	2	1	2	1	1	1	1	0	1	1	1	1	0	7
289	21	1	6	6	893	12	38	2900	48	2		1	1	1	4	3	2	2	0	3	3	3	3	3	3	3	1	1	1	1	1	1	1	1	1	7
290	21	1	6	6	894	6	38	2850	49	0		1	1	1	3	2	2	2	0	2	2	3	3	3	7	2	1	1	1	1	1	1	1	1	1	7
291	21	1	6	6	895	8	36	2700		0		1	1	1	4	3	2	2	0	3	3	3	3	3	8	2	1	1	1	1	1	1	1	1	1	7
292	21	1	6	6	896	7	38	2450	46	0		0	1	1	6	3	2	2	0	3	4	4	4	5	5	5	1	1	1	1	1	1	1	1	1	7
293	21	1	6	6	898	3	38	2700		2		1	0	0	0	0	2	0	0	0.5	1	0.5	1	0	2	0	1	1	1	0	1	0	1	0	0	5
294	21	1	6	6	899	8	38	3700	50	0		1	1	1	4	3	1	1	1	0.5	3	3	3	3	3	1	1	1	1	1	1	1	1	1	1	7
295	21	1	6	6	900	1	38	3850	52	0		1	1	0	0	0	1	0	0	0.5	2	3	2	2	3	0	1	1	1	0	1	1	1	0	0	6
296	21	1	6	6	901	5	38	2600		0		1	1	1	1	0.5	2	2	0	1	2	3	2	2	2	1	1	1	1	1	1	1	1	1	1	7
297	21	1	6	6	903	6	38	3400	50	0		1	0	0	0	0	2	0	0	1	2	3	2	2	2	2	1	1	1	0	1	1	1	1	0	7
298	21	1	6	6	904	9	38	2400		0		1	0	0	0	0	2	0	0	0	2	2	1	0	1	0	0	1	1	0	1	0	1	0	0	4
299	21	1	6	6	905	10	38	3550	47	0		1	1	1	7	3	2	2	0	3	3	4	3	4	8	4	1	1	1	1	1	1	1	1	1	7
300	21	1	6	6	906	6	38	3000	50	0		1	1	1	5	3	2	2	0	2	2	3	2	3	2	1	1	1	1	1	1	1	1	1	1	7
301	22	2	6	6	908	12	38	4500	54	2		1	1	1	3	2	2	2	0	1	2	3	2	3	7	2	1	1	1	1	1	1	1	1	1	7
302	22	2	6	6	909	6	38	3700	51	0		1	1	1	3	2	1	1	1	0.5	2	3	2	1	2	3	1	1	1	1	1	1	1	1	1	7
303	22	2	6	6	910	11	38	2700		0		1	1	1	3	2	2	2	0	0.5	2	3	2	2	3	2	1	1	1	1	1	1	1	1	1	7
304	22	2	6	6	911	3	38	3950		0		1	1	1	1	1	2	2	0	0	1	1	1	1	0	1	0	1	1	1	1	1	0	1	1	5
305	22	2	6	6	912	11	38	3650	53	2		0	1	1	4	3	2	2	0	2	3	4	2	3	6	2	1	1	1	1	1	1	1	1	1	7
306	22	2	6	6	915	10	38	3950	51	2		1	1	1	3	2	2	2	0	1	2	2	2	2	3	1	1	1	1	1	1	1	1	1	1	7
307	22	2	6	6	917	2	38	2400	48	0		1	1	1	2	2	1	1	1	1	2	3	2	2	3	1	1	1	1	1	1	1	1	1	1	7
308	22	2	6	6	920	3	38	3200	50	2		1	0	0	0	0	2	0	0	0	0	0	0	0	2	0	0	0	0	0	0	0	1	0	0	1
309	23	1	6	6	921	8	38	3500		0		1	0	0	0	0	2	0	0	0	2	2	1	0	5	1	0	1	1	0	1	0	1	1	0	5
310	23	1	6	6	923	10	38	2800	50	0		1	0	0	0	0	2	0	0	0.5	2	2	1	2	3	1	1	1	1	0	1	1	1	1	0	7
311	23	1	6	6	925	9	38	2700	47	0		1	1	0	0	0	2	0	0	0	2	2	2	2	1	0	0	1	1	0	1	1	1	0	0	5
312	23	1	6	6	926	10	38	2500	35	2		0	1	0	0	0	2	0	0	0	2	2	1	1	1	0	0	1	1	0	1	1	1	0	0	5
313	23	1	6	6	927	11	38	3100		0		1	1	0	0	0	2	0	0	0	1	0	1	1	0	0	0	1	0	0	1	1	0	0	0	3
314	23	1	6	6	928	7	38	3000	50	0		0	1	1	4	3	2	2	0	2	3	3	3	3	3	2	1	1	1	1	1	1	1	1	1	7
315	23	1	6	6	929	8	38	3500		0		1	1	1	2	1	2	2	0	1	1	2	1	2	1	0	1	1	1	1	1	1	1	0	1	6
316	23	1	6	6	930	3	38	2700	46	2		1	1	0	0	0	2	0	0	0.5	3	3	3	3	3	1	1	1	1	0	1	1	1	1	0	7
317	23	1	6	6	931	3	38	3400		0		1	0	0	0	0	2	0	0	0	3	2	2	1	2	0	0	1	1	0	1	1	1	0	0	5
318	23	1	6	6	932	12	35	2300		0		1	1	1	7	3	2	2	0	3	3	4	4	4	3	3	1	1	1	1	1	1	1	1	1	7
319	23	1	6	6	933	7	38	2700	48	0		0	1	1	3	2	2	2	0	1	2	3	3	2	2	0	1	1	1	1	1	1	1	0	1	6
320	23	1	6	6	934	10	38	2450	48	2		1	1	0	0	0	2	0	0	0	2	2	2	0	0	0	0	1	1	0	1	0	0	0	0	3
321	23	1	6	6	935	9	38	3400	50	0		1	1	0	0	0	2	0	0	0.5	2	2	2	1	1	1	1	1	1	0	1	1	1	1	0	7
322	23	1	6	6	937	6	37	3500	53	2		1	1	1	3	2	2	2	0	2	3	3	3	2	3	1	1	1	1	1	1	1	1	1	1	7
323	23	1	6	6	938	3	38	3500	51	0		1	1	1	2	1	1	1	1	0.5	2	2	2	1	2	0	1	1	1	1	1	1	1	0	1	6
324	23	1	6	1	939	4	38	3300		2		1	1	1	5	3	1	1	1	1	3	3	2	2	3	2	1	1	1	1	1	1	1	1	1	7
325	23	1	6	6	940	4	38	1500		0		1	1	0	0	0	2	0	0	0	3	2	2	1	2	1	0	1	1	0	1	1	1	1	0	6
326	23	1	6	6	941	11	38	3500		2		1	1	1	4	3	1	1	1	1	2	2	2	1	1	2	1	1	1	1	1	1	1	1	1	7
327	23	1	6	6	944	8	38	2900	51	0		1	1	1	8	4	1	1	1	3	3	3	3	3	3	3	1	1	1	1	1	1	1	1	1	7
328	24	2	6	6	945	4	38	2950	50	0		0	1	1	7	4	2	2	0	3	4	4	5	5	7	6	1	1	1	1	1	1	1	1	1	7
329	24	2	6	6	949	4	38	3100	47	0		1	1	1	3	2	2	2	0	0	2	3	2	1	2	0	0	1	1	1	1	1	1	0	1	5
330	24	2	6	6	951	8	38	3450	51	0		0	1	1	2	1	2	2	0	1	2	1	2	0	2	0	1	1	1	1	1	0	1	0	1	5
331	24	2	6	6	952	1	38	3500		2		1	1	0	0	0	2	0	0	0.5	1	1	2	1	1	0	1	1	1	0	1	1	1	0	0	6
332	24	2	6	6	953	7	38	3000	47	0		0	1	1	3	2	2	2	0	0.5	2	1	1	1	3	2	1	1	1	1	1	1	1	1	1	7
333	24	2	6	6	954	1	38	2700		0		1	1	1	3	2	2	2	0	3	3	3	2	3	7	3	1	1	1	1	1	1	1	1	1	7
334	24	2	6	6	955	6	38			0		1	1	1	3	2	2	2	0	3	3	3	3	2	7	3	1	1	1	1	1	1	1	1	1	7
335	24	2	6	6	957	1	38	3500		2		1	1	0	0	0	2	0	0	0.5	2	1	2	1	3	0	1	1	1	0	1	1	1	0	0	6
336	24	2	6	6	958	5	38	3250	50	0		1	1	0	0	0	2	0	0	2	3	3	2	2	5	2	1	1	1	0	1	1	1	1	0	7
337	24	2	6	6	959	6	38	2000		2		1	1	0	0	0	2	0	0	0	2	2	2	2	2	0	0	1	1	0	1	1	1	0	0	5
338	24	2	6	6	960	10	38	3450	51	0		1	0	0	0	0	2	0	0	0.5	1	0.5	2	1	3	0	1	1	1	0	1	1	1	0	0	6
339	24	2	6	6	961	1	38	3330	52	2		1	0	0	0	0	2	0	0	1	0.5	1	1	0	1	0	1	1	1	0	1	0	1	0	0	5
340	24	2	6	6	962	7	34	2100		2		1	1	1	3	3	2	2	0	2	3	3	3	2	3	3	1	1	1	1	1	1	1	1	1	7
341	24	2	6	6	963	8	38	2700		2		1	1	0	0	0	2	0	0	0.5	2	2	3	1	2	0	1	1	1	0	1	1	1	0	0	6
342	24	2	6	6	965	1	38	2250		2		1	1	1	2	1	2	2	0	1	2	2	2	1	5	3	1	1	1	1	1	1	1	1	1	7
343	24	2	6	6	966	3	38	2000		0		1	1	1	5	3	2	2	0	1	3	3	4	2	3	3	1	1	1	1	1	1	1	1	1	7
344	24	2	6	6	971	12	38			0		1	1	1	2	0	2	0	0	1	2	2	1	2	7	1	1	1	1	0	1	1	1	1	1	7
345	24	2	6	6	974	7	36	2750	48	0		1	1	0	0	0	2	0	0	1	0.5	1	1	1	9	0	1	1	1	0	1	1	1	0	0	6
346	24	2	6	6	975	9	38	2700		0		1	1	1	3	1	2	2	0	1	3	3	3	2	2	1	1	1	1	1	1	1	1	1	1	7
347	24	2	6	6	976	1	38	3500		2		1	1	1	1	0.5	2	2	0	0.5	1	0	2	1	1	0	1	1	0	1	1	1	1	0	1	5
348	24	2	6	6	977	6	38	3100	50	2		1	1	1	3	2	1	1	1	3	3	3	3	3	8	2	1	1	1	1	1	1	1	1	1	7
349	24	2	6	6	978	1	38	3150	52	0		0	1	1	3	1	2	2	0	2	2	2	2	2	2	1	1	1	1	1	1	1	1	1	1	7
350	24	2	6	6	979	5	38	2800		2		1	1	1	1	1	2	2	0	0	1	2	1	1	8	0	0	1	1	1	1	1	1	0	1	5
351	24	2	6	5	981	12	38	3450	51	2		1	1	0	0	0	1	0	0	0.5	3	1	2	2	3	0	1	1	1	0	1	1	1	0	0	6
352	24	2	6	6	983	7	38	3800	52	2		1	0	0	0	0	2	0	0	0	2	2	1	0	2	2	0	1	1	0	1	0	1	1	0	5
353	19	2	2	1	995	8	38	4000		2		1	1	0	0	0	2	0	0	0	2	0	2	0	1	1	0	1	0	0	1	0	1	1	0	4
354	19	2	2	1	996	2	38	2500	49	2		1	1	0	0	0	2	0	0	0.5	1	0	1	2	1	1	1	1	0	0	1	1	1	1	0	6
355	19	2	2	1	998	10	38	2700	48	0		1	0	0	0	0	2	0	0	0	0.5	0	0	0	0	0	0	1	0	0	0	0	0	0	0	1
356	19	2	2	1	1001	2	38	3350	52	2		1	1	1	2	1	2	2	0	3	3	3	2	3	3	2	1	1	1	1	1	1	1	1	1	7
357	19	2	2	1	1002	11	38	3200		0		1	1	1	5	3	2	2	0	3	2	2	2	2	3	3	1	1	1	1	1	1	1	1	1	7
358	19	2	2	1	1008	2	38	3050	45	2		1	1	1	1	1	1	1	1	0.5	1	0	1	1	4	0	1	1	0	1	1	1	1	0	1	5
359	19	2	2	1	1009	1	38	2950		2		1	0	0	0	0	2	0	0	1	3	2	1	2	1	2	1	1	1	0	1	1	1	1	0	7
360	19	2	2	1	1014	10	38	4000		2		0	1	0	0	0	2	0	0	0	1	0.5	1	2	3	0	0	1	1	0	1	1	1	0	0	5
361	19	2	2	1	1017	5	38	4150		2		1	1	0	0	0	1	0	0	0	1	0	0	1	9	0	0	1	0	0	0	1	1	0	0	3
362	25	1	2	1	1019	6	38	2800	47	2		1	1	0	0	0	2	0	0	2	3	3	2	2	8	0	1	1	1	0	1	1	1	0	0	6
363	25	1	2	1	1023	9	38	3600		2		1	0	0	0	0	2	0	0	0	0.5	0	0	0	2	0	0	1	0	0	0	0	1	0	0	2
364	25	1	2	1	1028	10	38	3920	51	2		0	1	0	0	0	2	0	0	0	0	0	1	1	2	0	0	0	0	0	1	1	1	0	0	3
365	25	1	2	1	1032	11	38	3000		0		1	1	0	0	0	1	0	0	0.5	3	1	2	3	2	1	1	1	1	0	1	1	1	1	0	7
366	25	1	2	1	1037	1	38	2700	49	0		1	0	0	0	0	2	0	0	0	0	0	0	0	0	0	0	0	0	0	0	0	0	0	0	0
367	25	1	2	1	1071	7	38	2600		2		1	0	0	0	0	2	0	0	0	0.5	0	1	1	1	0	0	1	0	0	1	1	1	0	0	4
